# Supplementary material for: Semiconductor Quantum Dots (CdX, X = S, Te, Se) Modify Titanium Dioxide Nanoparticles for Photodynamic Inactivation of Leukemia HL60 Cancer Cells
Source: Hindawi journal article supplement (doi:10.1155/2021/4125350), 2021-12-15
Supplement: f1 [file 4125350.f1.zip]

Archive with 2 entries (2 files):
- (PDF) Supplementary Materials.pdf
- Supplementary Materials.docx
